# Supplementary material for: Genetic Characterization of a Sheep Population in Oaxaca, Mexico: The Chocholteca Creole
Source: MDPI journal article supplement (doi:10.3390/ani11041172), 2021-04-20
Supplement: s1 [file s1]

**Supplement 1.** Table 4. Parameters of genetic diversity of the 28 breeds. The table shows values corresponding to Ae, Ho He, Fis and Fis IC from each sheep used in the analisis.

|              | <b>Ae</b> | <b>Ho</b> | <b>He</b> | <b>Fis</b> | <b>Fis IC (95%)</b>   |
|--------------|-----------|-----------|-----------|------------|-----------------------|
| <b>MEXO</b>  | 3.01      | 0.6783    | 0.6568    | -0.03352   | (-0.10490 - -0.00137) |
| <b>CChO</b>  | 3.327     | 0.6059    | 0.6847    | 0.11703    | (0.03578 - 0.15433)   |
| <b>CHI</b>   | 3.22      | 0.6278    | 0.6967    | 0.10050    | (0.03575 - 0.13188)   |
| <b>BR</b>    | 2.62      | 0.5689    | 0.5604    | -0.01433   | (-0.09125 - 0.01864)  |
| <b>COL</b>   | 3.29      | 0.6472    | 0.6957    | 0.07079    | (0.00435 - 0.10399)   |
| <b>ECU</b>   | 3.03      | 0.6439    | 0.6554    | 0.01820    | (-0.07060 - 0.04410)  |
| <b>PGY</b>   | 3.41      | 0.6751    | 0.7369    | 0.08525    | (0.01239 - 0.12402)   |
| <b>ARG</b>   | 3.32      | 0.6070    | 0.7039    | 0.13970    | (0.07564 - 0.16798)   |
| <b>BLK</b>   | 3.35      | 0.6399    | 0.7053    | 0.09481    | (0.02738 - 0.10971)   |
| <b>PECU</b>  | 2.93      | 0.5311    | 0.6284    | 0.15717    | (0.07800 - 0.20340)   |
| <b>PECUB</b> | 3.31      | 0.6204    | 0.7024    | 0.12011    | (0.01876 - 0.16116)   |
| <b>PEMEX</b> | 3.63      | 0.6165    | 0.7185    | 0.14446    | (0.08316 - 0.16769)   |
| <b>PEKAT</b> | 3.04      | 0.6154    | 0.6606    | 0.07112    | (-0.03926 - 0.08204)  |
| <b>PSAL</b>  | 2.99      | 0.6255    | 0.6385    | 0.02095    | (-0.06595 - 0.06000)  |
| <b>MALL</b>  | 3.22      | 0.6111    | 0.6644    | 0.08149    | (0.02005 - 0.11343)   |
| <b>MEN</b>   | 3.41      | 0.6394    | 0.7247    | 0.11949    | (0.04444 - 0.16022)   |
| <b>ORM</b>   | 3.39      | 0.6347    | 0.7108    | 0.10868    | (0.04534 - 0.14099)   |
| <b>CHU</b>   | 3.50      | 0.6570    | 0.7384    | 0.11201    | (0.05036 - 0.13725)   |
| <b>SEG</b>   | 3.48      | 0.7125    | 0.7408    | 0.03889    | (-0.01704 - 0.05975)  |
| <b>CAN</b>   | 3.27      | 0.6484    | 0.7113    | 0.08977    | (0.02195 - 0.12356)   |
| <b>PAL</b>   | 2.70      | 0.5764    | 0.5784    | 0.00360    | (-0.07264 - 0.04326)  |
| <b>PB</b>    | 3.21      | 0.6309    | 0.6924    | 0.09029    | (0.01938 - 0.12306)   |
| <b>ME</b>    | 3.22      | 0.6478    | 0.7028    | 0.07946    | (0.02347 - 0.10171)   |
| <b>PCHI</b>  | 3.33      | 0.7002    | 0.7159    | 0.02243    | (-0.05278 - 0.04584)  |
| <b>BAL</b>   | 2.99      | 0.6041    | 0.6384    | 0.05463    | (-0.00385 - 0.07874)  |
| <b>SI</b>    | 3.28      | 0.6800    | 0.7086    | 0.04144    | (-0.03117 - 0.05546)  |

|             |      |        |        |         |                      |
|-------------|------|--------|--------|---------|----------------------|
| <b>UDA</b>  | 3.17 | 0.6146 | 0.6841 | 0.10318 | (0.03661 - 0.13182)  |
| <b>DORP</b> | 2.73 | 0.5137 | 0.6100 | 0.17653 | (-0.10749 - 0.18274) |

Ae: number of Allele expected, Ho: observed heterozigosity, He: expected heterozygosity, Fis: coefficient of consanguinity, Fis IC: confidence interval.

**Supplement 2.** Genetic Distances (DA) are shown in red and the coefficient of genetic differentiation (FST) in blue between pairs of the populations used. The values for Oaxacan Creole are highlighted in black.

|              | 1     | 2     | 3     | 4     | 5     | 6     | 7     | 8     | 9     | 10    | 11    | 12    | 13    | 14    | 15    | 16    | 17    | 18    | 19    | 20    | 21    | 22    | 23    | 24    | 25    | 26    | 27    | 28    |
|--------------|-------|-------|-------|-------|-------|-------|-------|-------|-------|-------|-------|-------|-------|-------|-------|-------|-------|-------|-------|-------|-------|-------|-------|-------|-------|-------|-------|-------|
| <b>CChO</b>  | ***   | 0.115 | 0.122 | 0.218 | 0.098 | 0.145 | 0.126 | 0.088 | 0.118 | 0.159 | 0.124 | 0.121 | 0.163 | 0.143 | 0.126 | 0.092 | 0.113 | 0.102 | 0.099 | 0.132 | 0.22  | 0.114 | 0.139 | 0.108 | 0.175 | 0.14  | 0.149 | 0.174 |
| <b>MEXO</b>  | 0.125 | ***   | 0.097 | 0.161 | 0.091 | 0.086 | 0.083 | 0.073 | 0.084 | 0.154 | 0.115 | 0.106 | 0.123 | 0.124 | 0.082 | 0.061 | 0.088 | 0.069 | 0.061 | 0.106 | 0.169 | 0.103 | 0.089 | 0.071 | 0.142 | 0.097 | 0.092 | 0.131 |
| <b>CHI</b>   | 0.132 | 0.104 | ***   | 0.157 | 0.092 | 0.091 | 0.074 | 0.091 | 0.081 | 0.113 | 0.074 | 0.081 | 0.116 | 0.096 | 0.087 | 0.068 | 0.08  | 0.065 | 0.067 | 0.095 | 0.155 | 0.095 | 0.097 | 0.079 | 0.114 | 0.083 | 0.099 | 0.147 |
| <b>BR</b>    | 0.247 | 0.179 | 0.173 | ***   | 0.133 | 0.086 | 0.127 | 0.164 | 0.115 | 0.192 | 0.166 | 0.134 | 0.146 | 0.108 | 0.135 | 0.137 | 0.146 | 0.132 | 0.128 | 0.132 | 0.235 | 0.179 | 0.121 | 0.125 | 0.19  | 0.155 | 0.176 | 0.162 |
| <b>COL</b>   | 0.105 | 0.098 | 0.098 | 0.145 | ***   | 0.079 | 0.086 | 0.086 | 0.053 | 0.112 | 0.075 | 0.059 | 0.093 | 0.071 | 0.098 | 0.075 | 0.104 | 0.07  | 0.065 | 0.097 | 0.149 | 0.058 | 0.092 | 0.071 | 0.105 | 0.074 | 0.072 | 0.083 |
| <b>ECU</b>   | 0.157 | 0.092 | 0.097 | 0.092 | 0.084 | ***   | 0.081 | 0.094 | 0.061 | 0.132 | 0.109 | 0.066 | 0.105 | 0.042 | 0.086 | 0.091 | 0.091 | 0.07  | 0.066 | 0.082 | 0.169 | 0.109 | 0.084 | 0.083 | 0.142 | 0.093 | 0.1   | 0.125 |
| <b>PGY</b>   | 0.137 | 0.089 | 0.079 | 0.139 | 0.092 | 0.087 | ***   | 0.065 | 0.087 | 0.112 | 0.085 | 0.071 | 0.083 | 0.097 | 0.087 | 0.061 | 0.086 | 0.054 | 0.044 | 0.068 | 0.146 | 0.092 | 0.078 | 0.067 | 0.116 | 0.081 | 0.093 | 0.1   |
| <b>ARG</b>   | 0.094 | 0.078 | 0.098 | 0.182 | 0.092 | 0.101 | 0.07  | ***   | 0.089 | 0.119 | 0.096 | 0.083 | 0.109 | 0.099 | 0.103 | 0.049 | 0.087 | 0.058 | 0.057 | 0.081 | 0.138 | 0.096 | 0.102 | 0.075 | 0.145 | 0.112 | 0.113 | 0.113 |
| <b>BLK</b>   | 0.128 | 0.091 | 0.088 | 0.125 | 0.057 | 0.066 | 0.093 | 0.096 | ***   | 0.105 | 0.052 | 0.025 | 0.082 | 0.053 | 0.083 | 0.059 | 0.075 | 0.066 | 0.064 | 0.093 | 0.171 | 0.09  | 0.079 | 0.065 | 0.106 | 0.073 | 0.081 | 0.09  |
| <b>PECU</b>  | 0.176 | 0.17  | 0.123 | 0.215 | 0.121 | 0.144 | 0.122 | 0.13  | 0.114 | ***   | 0.105 | 0.108 | 0.159 | 0.122 | 0.111 | 0.116 | 0.124 | 0.107 | 0.107 | 0.128 | 0.21  | 0.129 | 0.136 | 0.12  | 0.129 | 0.108 | 0.135 | 0.166 |
| <b>PECUB</b> | 0.135 | 0.127 | 0.181 | 0.184 | 0.081 | 0.118 | 0.093 | 0.106 | 0.058 | 0.115 | ***   | 0.044 | 0.086 | 0.095 | 0.092 | 0.067 | 0.073 | 0.07  | 0.064 | 0.086 | 0.144 | 0.078 | 0.101 | 0.077 | 0.082 | 0.065 | 0.084 | 0.111 |
| <b>PEMEX</b> | 0.131 | 0.115 | 0.087 | 0.147 | 0.063 | 0.072 | 0.076 | 0.09  | 0.177 | 0.095 | 0.077 | ***   | 0.07  | 0.065 | 0.084 | 0.063 | 0.069 | 0.059 | 0.056 | 0.075 | 0.149 | 0.08  | 0.097 | 0.073 | 0.107 | 0.069 | 0.085 | 0.073 |
| <b>PEKAT</b> | 0.179 | 0.135 | 0.126 | 0.161 | 0.1   | 0.114 | 0.09  | 0.119 | 0.09  | 0.177 | 0.095 | 0.077 | ***   | 0.109 | 0.126 | 0.101 | 0.115 | 0.1   | 0.087 | 0.123 | 0.188 | 0.118 | 0.14  | 0.113 | 0.135 | 0.108 | 0.114 | 0.116 |
| <b>PSAL</b>  | 0.156 | 0.135 | 0.103 | 0.117 | 0.076 | 0.044 | 0.104 | 0.107 | 0.057 | 0.133 | 0.103 | 0.07  | 0.118 | ***   | 0.11  | 0.1   | 0.117 | 0.091 | 0.091 | 0.102 | 0.189 | 0.115 | 0.108 | 0.095 | 0.119 | 0.095 | 0.096 | 0.128 |
| <b>MALL</b>  | 0.136 | 0.088 | 0.093 | 0.148 | 0.104 | 0.091 | 0.093 | 0.111 | 0.089 | 0.12  | 0.099 | 0.09  | 0.137 | 0.118 | ***   | 0.059 | 0.06  | 0.055 | 0.044 | 0.085 | 0.177 | 0.098 | 0.105 | 0.063 | 0.11  | 0.081 | 0.095 | 0.132 |
| <b>MEN</b>   | 0.098 | 0.066 | 0.073 | 0.15  | 0.079 | 0.098 | 0.065 | 0.052 | 0.064 | 0.126 | 0.073 | 0.068 | 0.11  | 0.108 | 0.062 | ***   | 0.051 | 0.032 | 0.033 | 0.07  | 0.135 | 0.077 | 0.085 | 0.047 | 0.108 | 0.071 | 0.091 | 0.098 |
| <b>ORM</b>   | 0.122 | 0.094 | 0.085 | 0.16  | 0.112 | 0.097 | 0.092 | 0.093 | 0.08  | 0.135 | 0.079 | 0.075 | 0.125 | 0.126 | 0.063 | 0.054 | ***   | 0.062 | 0.058 | 0.074 | 0.146 | 0.094 | 0.084 | 0.058 | 0.125 | 0.068 | 0.109 | 0.131 |
| <b>CHU</b>   | 0.109 | 0.074 | 0.069 | 0.144 | 0.074 | 0.075 | 0.058 | 0.062 | 0.072 | 0.116 | 0.076 | 0.064 | 0.109 | 0.098 | 0.059 | 0.034 | 0.066 | ***   | 0.028 | 0.052 | 0.127 | 0.073 | 0.076 | 0.056 | 0.096 | 0.063 | 0.075 | 0.084 |
| <b>SEG</b>   | 0.105 | 0.065 | 0.071 | 0.14  | 0.068 | 0.07  | 0.046 | 0.06  | 0.068 | 0.115 | 0.069 | 0.06  | 0.093 | 0.097 | 0.046 | 0.034 | 0.061 | 0.03  | ***   | 0.054 | 0.128 | 0.073 | 0.065 | 0.037 | 0.091 | 0.064 | 0.069 | 0.086 |

|      |       |       |       |       |       |        |       |       |       |       |       |       |       |       |       |       |       |       |       |       |       |       |       |       |       |       |       |       |
|------|-------|-------|-------|-------|-------|--------|-------|-------|-------|-------|-------|-------|-------|-------|-------|-------|-------|-------|-------|-------|-------|-------|-------|-------|-------|-------|-------|-------|
| CAN  | 0.143 | 0.114 | 0.101 | 0.144 | 0.103 | 0.087  | 0.073 | 0.087 | 0.1   | 0.139 | 0.093 | 0.081 | 0.134 | 0.11  | 0.09  | 0.074 | 0.079 | 0.056 | 0.057 | ***   | 0.11  | 0.092 | 0.091 | 0.089 | 0.113 | 0.082 | 0.106 | 0.116 |
| PAL  | 0.248 | 0.187 | 0.169 | 0.269 | 0.162 | 0.186  | 0.159 | 0.15  | 0.189 | 0.238 | 1.157 | 0.163 | 0.208 | 0.21  | 0.196 | 0.146 | 0.159 | 0.137 | 0.137 | 0.117 | ***   | 0.154 | 0.178 | 0.161 | 0.191 | 0.166 | 0.175 | 0.196 |
| PB   | 0.122 | 0.111 | 0.101 | 0.2   | 0.062 | 0.118  | 0.098 | 0.103 | 0.096 | 0.141 | 0.085 | 0.086 | 0.128 | 0.124 | 0.104 | 0.082 | 0.101 | 0.077 | 0.077 | 0.098 | 0.168 | ***   | 0.11  | 0.086 | 0.123 | 0.076 | 0.088 | 0.13  |
| ME   | 0.121 | 0.095 | 0.103 | 0.131 | 0.098 | 0.09   | 0.083 | 0.11  | 0.085 | 0.148 | 0.11  | 0.105 | 0.153 | 0.117 | 0.113 | 0.091 | 0.089 | 0.081 | 0.068 | 0.096 | 0.197 | 0.118 | ***   | 0.064 | 0.136 | 0.108 | 0.118 | 0.123 |
| PCHI | 0.115 | 0.075 | 0.083 | 0.136 | 0.075 | 0.087  | 0.071 | 0.08  | 0.069 | 0.13  | 0.083 | 0.078 | 0.121 | 0.101 | 0.066 | 0.05  | 0.061 | 0.059 | 0.038 | 0.094 | 0.176 | 0.091 | 0.068 | ***   | 0.116 | 0.087 | 0.088 | 0.113 |
| BAL  | 0.194 | 0.154 | 0.122 | 0.211 | 0.112 | 0.0154 | 0.125 | 0.158 | 0.113 | 0.14  | 0.089 | 0.115 | 0.147 | 0.128 | 0.118 | 0.116 | 0.135 | 0.103 | 0.097 | 0.121 | 0.212 | 0.132 | 0.148 | 0.124 | ***   | 0.062 | 0.047 | 0.124 |
| SI   | 0.152 | 0.104 | 0.088 | 0.17  | 0.079 | 0.099  | 0.086 | 0.121 | 0.078 | 0.117 | 0.07  | 0.075 | 0.117 | 0.102 | 0.086 | 0.076 | 0.072 | 0.067 | 0.067 | 0.087 | 0.183 | 0.08  | 0.116 | 0.092 | 0.065 | ***   | 0.048 | 0.125 |
| UDA  | 0.163 | 0.099 | 0.106 | 0.197 | 0.076 | 0.107  | 0.1   | 0.122 | 0.087 | 0.147 | 0.091 | 0.092 | 0.125 | 0.103 | 0.101 | 0.097 | 0.117 | 0.08  | 0.072 | 0.113 | 0.194 | 0.094 | 0.127 | 0.093 | 0.049 | 0.051 | ***   | 0.103 |
| DORP | 0.198 | 0.157 | 0.172 | 0.185 | 0.099 | 0.146  | 0.119 | 0.135 | 0.109 | 0.197 | 0.134 | 0.094 | 0.138 | 0.147 | 0.153 | 0.118 | 0.154 | 0.102 | 0.101 | 0.135 | 0.223 | 0.153 | 0.143 | 0.13  | 0.143 | 0.145 | 0.123 | ***   |
